# Supplementary material for: Comparison of the Simulated Response of Three in Silico Human Stem Cell-Derived Cardiomyocytes Models and in Vitro Data Under 15 Drug Actions
Source: PubMed Central journal article supplement (PMC8033762; doi:10.3389/fphar.2021.604713), 2021-03-15
Supplement: datasheet1.pdf [file datasheet1.pdf]

*Supplementary Material*

**Comparison of the Simulated Response of Three *in Silico* Human Stem Cell-Derived Cardiomyocytes Models and *in Vitro* Data Under 15 Drug Actions**

**Michelangelo Paci\*, Jussi T. Koivumäki, Hua Rong Lu, David J. Gallacher, Elisa Passini, Blanca Rodriguez**

\* Correspondence: Michelangelo Paci: [michelangelo.paci@tuni.fi](mailto:michelangelo.paci@tuni.fi)

## 1 Supplementary Figures

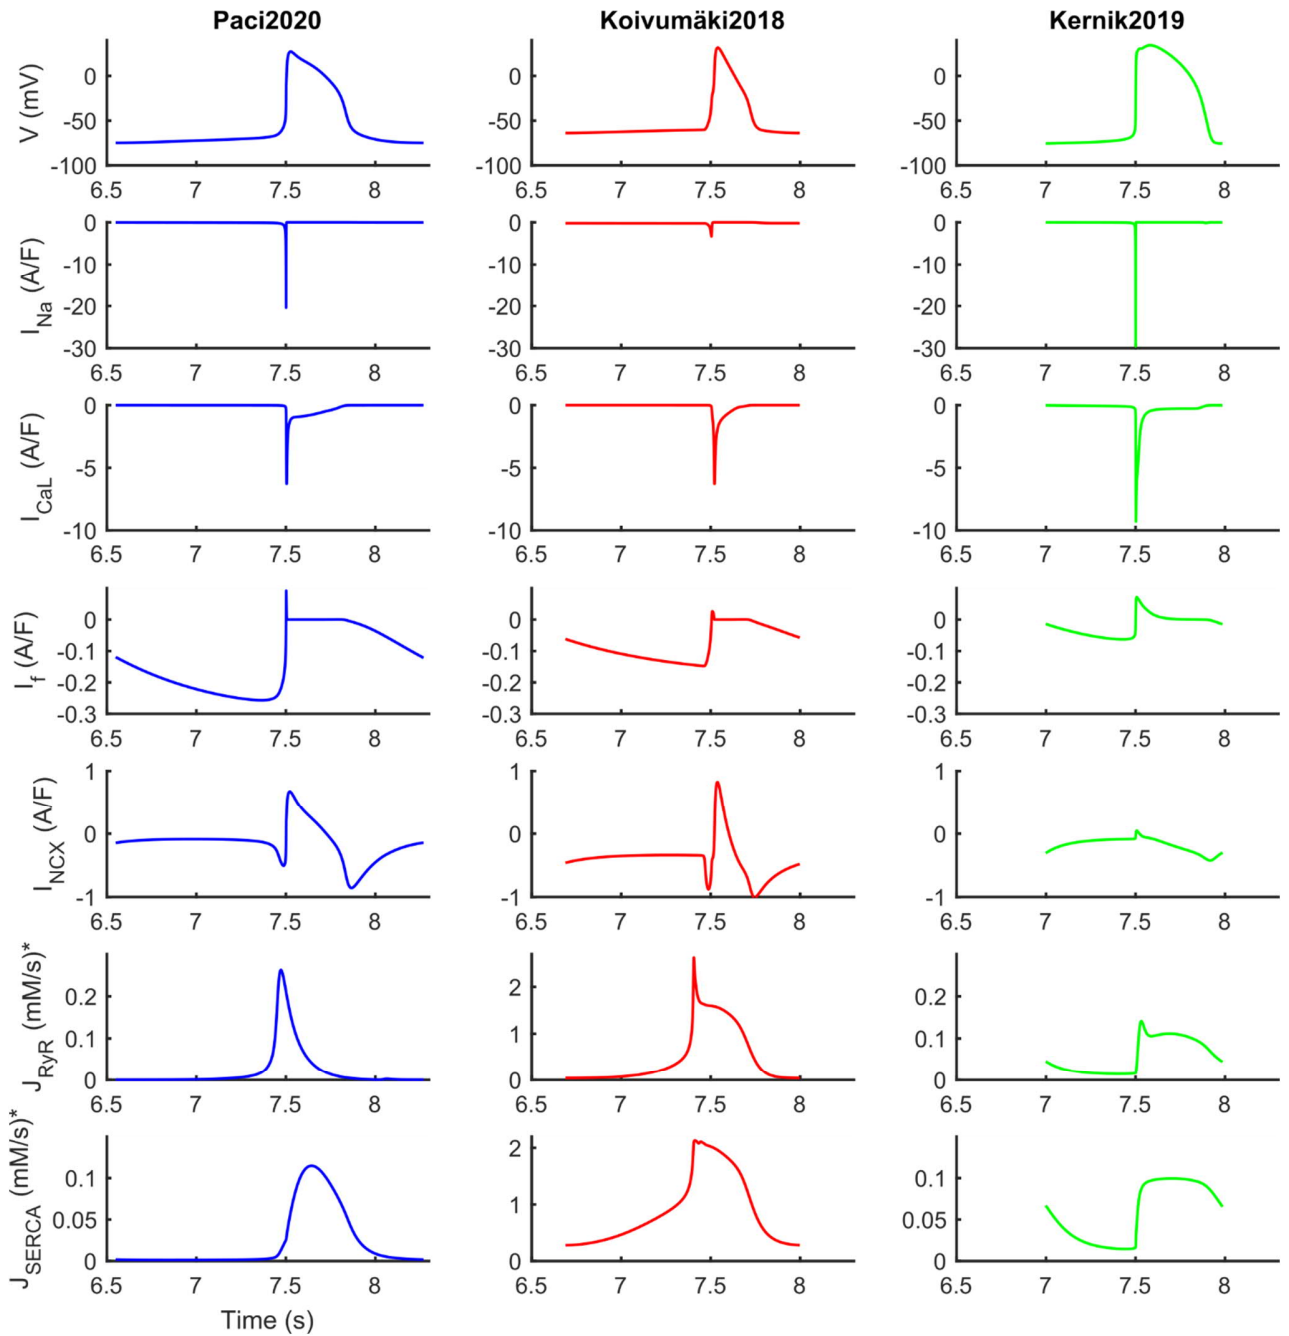

Figure S1. Expanded version of Figure 1 in the main manuscript. Ion currents underlying the steady-state action potentials in the Paci2020 (blue), Koivumäki2018 (red) and Kernik2019 (green) models: membrane potential ( $V$ ), fast  $\text{Na}^+$  current ( $I_{\text{Na}}$ ), L-type  $\text{Ca}^{2+}$  current ( $I_{\text{CaL}}$ ), Funny current ( $I_f$ ),  $\text{Na}^+$ - $\text{Ca}^{2+}$  exchanger ( $I_{\text{NCX}}$ ), release current from sarcoplasmic reticulum ( $J_{\text{RyR}}$ ) and SERCA pump ( $J_{\text{SERCA}}$ ). The y scale of the ion current/fluxes marked with a star was adapted to each model to improve visibility.

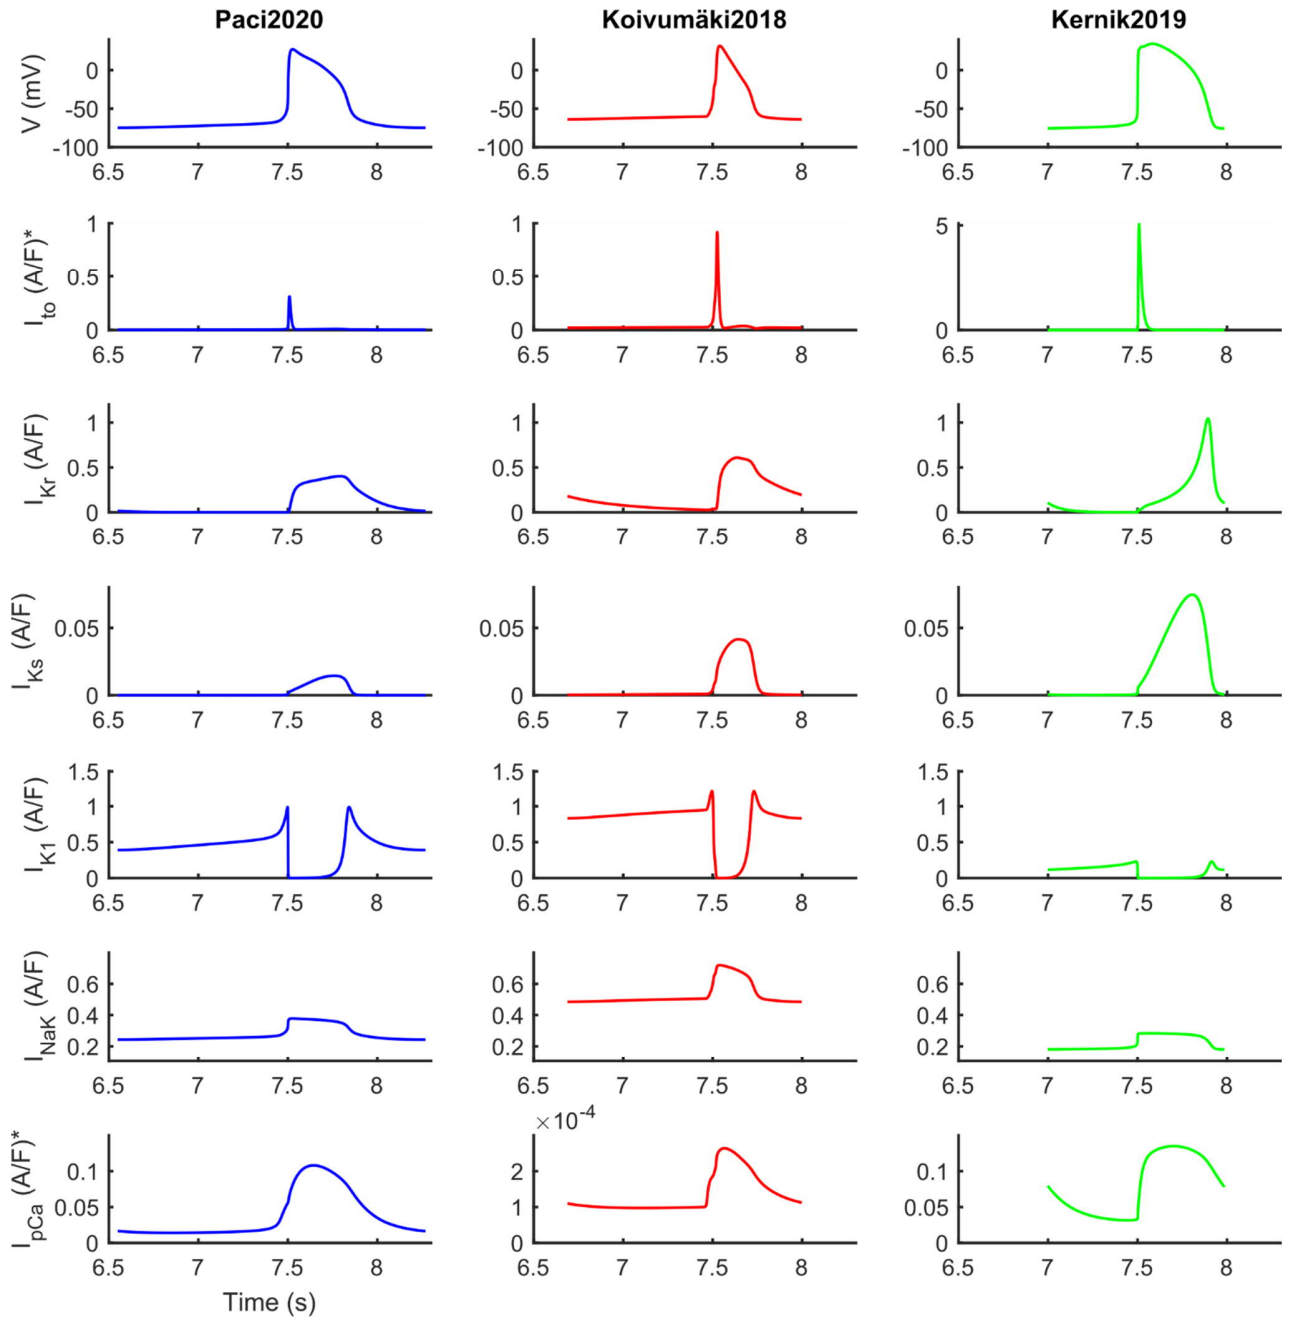

Figure S2. Expanded version of Figure 1 in the main manuscript. Ion currents underlying the steady-state action potentials in the Paci2020 (blue), Koivumäki2018 (red) and Kernik2019 (green) models: membrane potential ( $V$ ), transient outward  $K^+$  current ( $I_{to}$ ), rapid delayed rectifying  $K^+$  current ( $I_{Kr}$ ), slow delayed rectifying  $K^+$  current ( $I_{Ks}$ ), inward rectifying  $K^+$  current ( $I_{K1}$ ),  $Na^+$ - $K^+$  pump ( $I_{NaK}$ ) and sarcolemma  $Ca^{2+}$  pump ( $I_{pCa}$ ). The y scale of the ion current/fluxes marked with a star was adapted to each model to improve visibility.

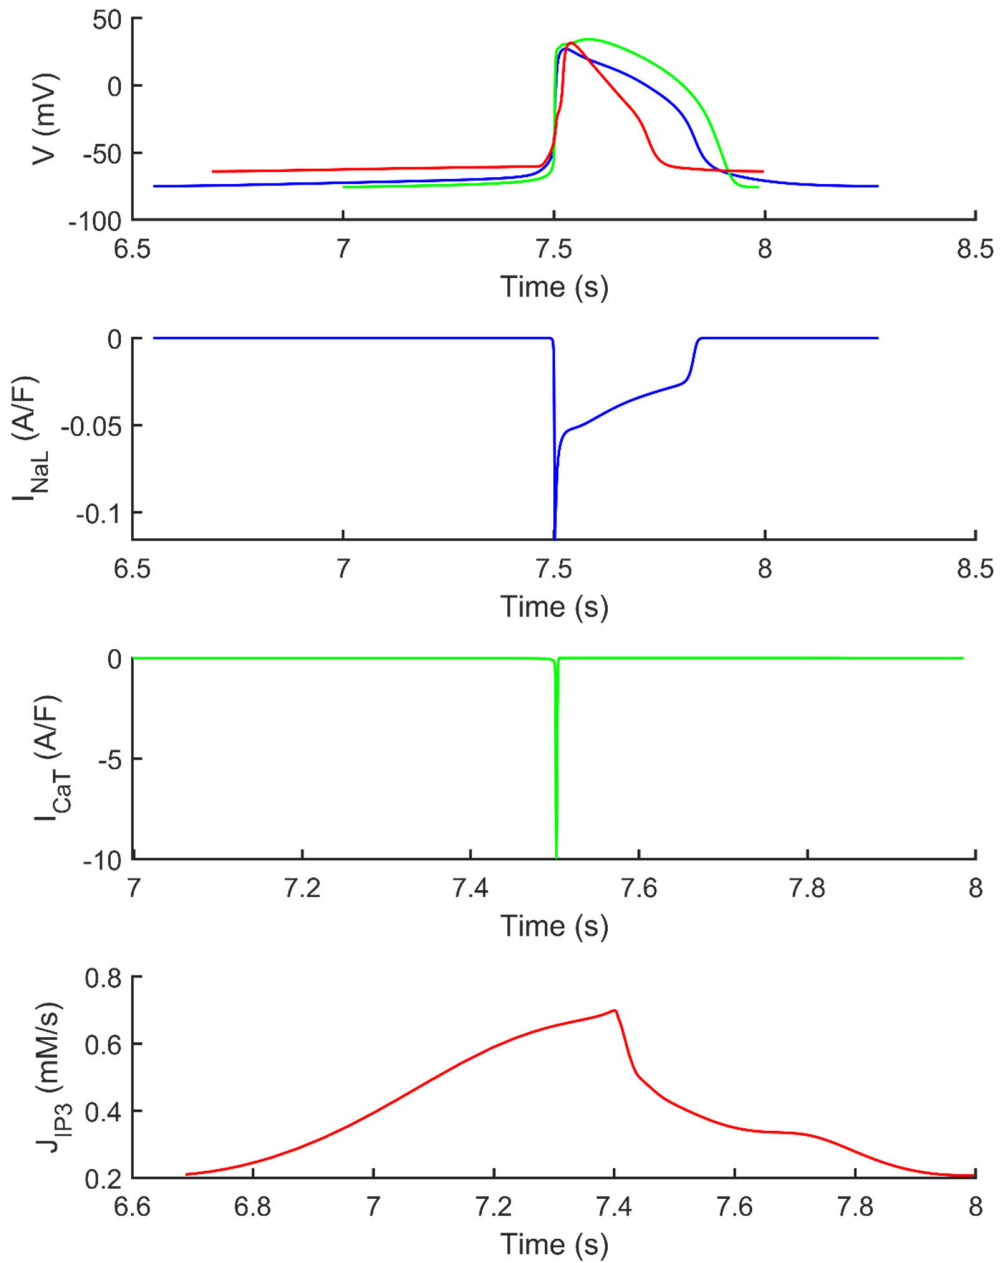

Figure S3. Ion currents/fluxes included only in one of the three models. Pac2020 (blue), Kernik2019 (green) and Koivumäki2018 (red). From top to bottom: membrane potential, Late Na<sup>+</sup> current ( $I_{NaL}$ ), T-type Ca<sup>2+</sup> current ( $I_{CaT}$ ), and Inositol 1,4,5 triphosphate receptor-mediated Ca<sup>2+</sup> release ( $J_{IP3}$ ).

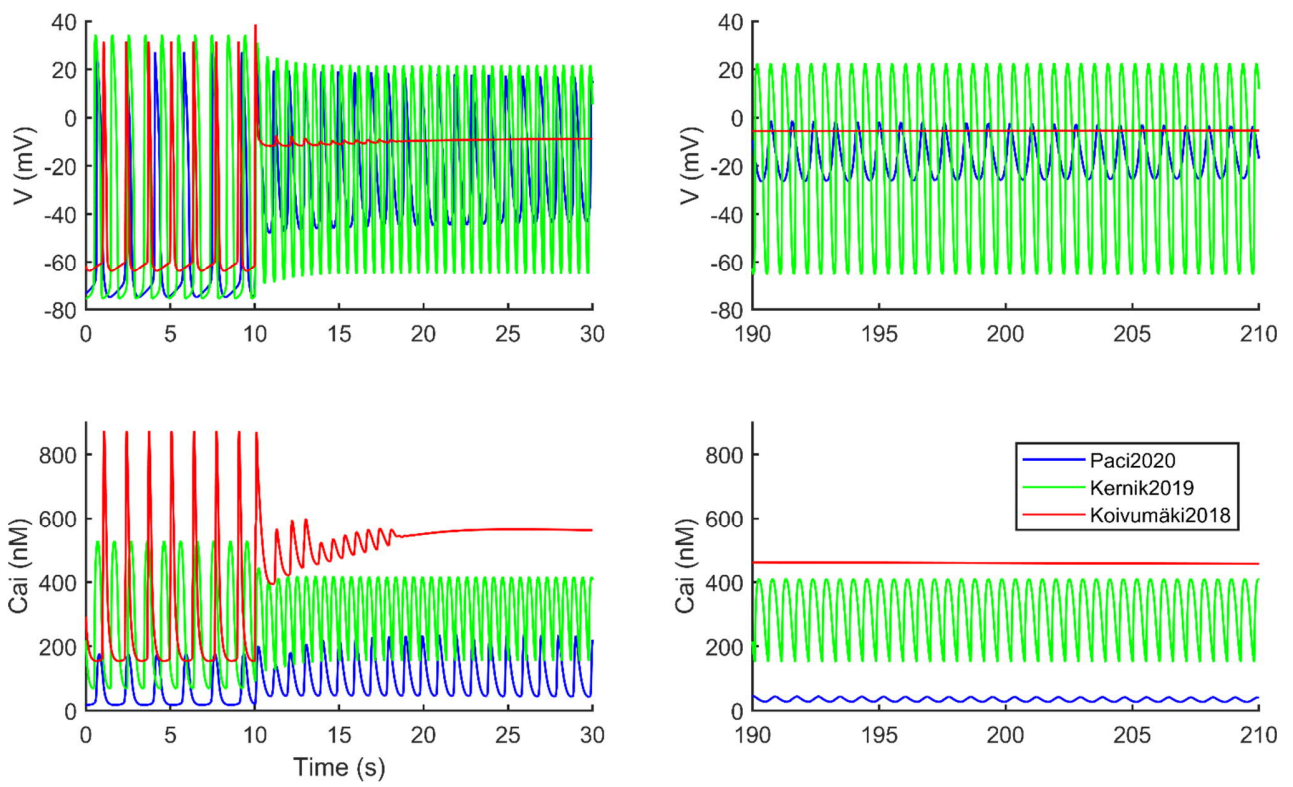

Figure S4. Effect of 100  $\mu\text{M}$   $\text{BaCl}_2$  (concentration C3) on the three *in silico* models.

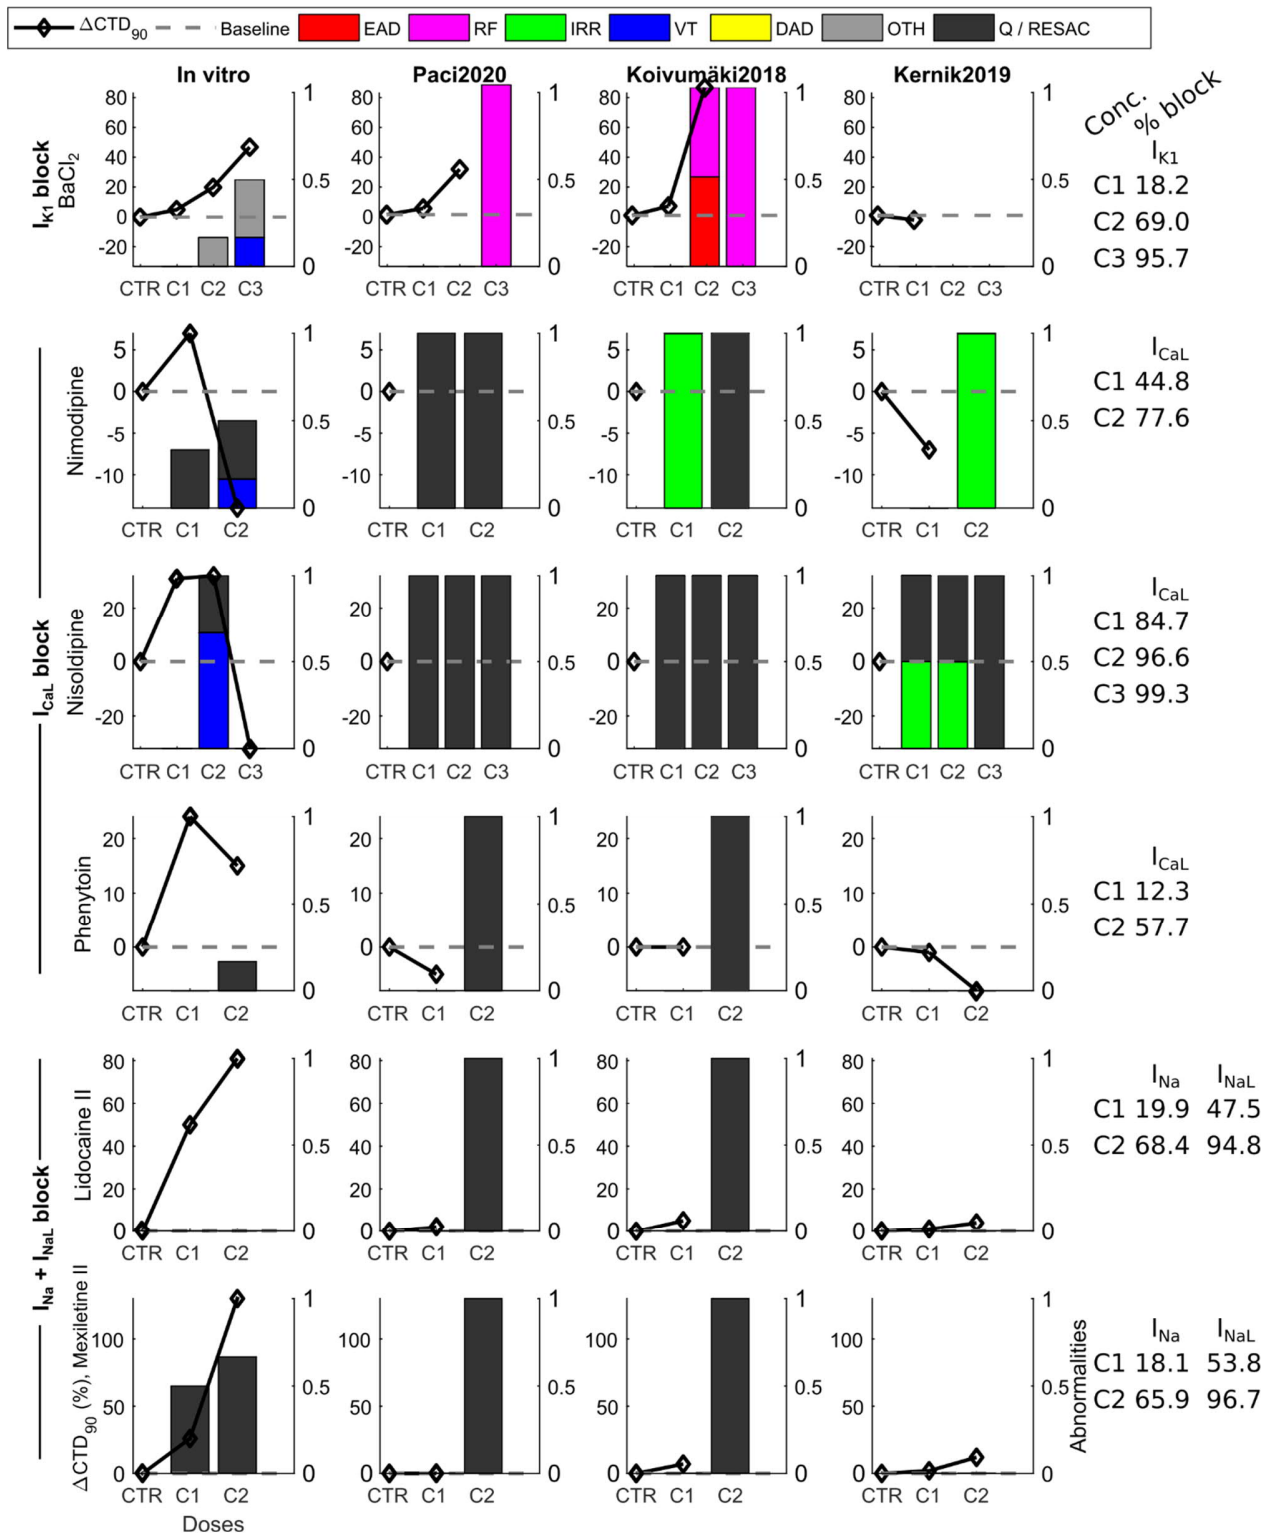

Figure S5. Left axis: percentage change in  $\text{Ca}^{2+}$  transient ( $\text{CaT}$ ) duration with respect to baseline as consequence of drug administration ( $\Delta\text{CTD}_{90}\%$ ). *In vitro* and *in silico* experiments are reported as black diamonds. In case of missing *in silico* data points, the simulations produced AP/ $\text{CaT}$  arrhythmic events and it was not possible computing the  $\text{CTD}_{90}$ .  $\text{BaCl}_2$  in Kernik2019 slightly depolarized the

maximum diastolic potential and induced high rate  $\text{Ca}^{2+}$  oscillations, but did not trigger RF. Right axis: occurrence of arrhythmic events or cessation of spontaneous activity. *In vitro* data are reported as percent of events recorded on the six observations. In case of multiple *in silico* events, the bar was split accordingly. Early afterdepolarization (EAD), repolarization failure (RF), irregular rhythm (IRR), ventricular tachycardia (VT), delayed afterdepolarization (DAD), other events observed *in vitro* (OTH), cessation of spontaneous activity and/or residual electrical activity (Q/RESAC).  $\text{CTD}_{90}$  values for Koivumäki2018 for  $\text{BaCl}_2$  concentration C2 were manually computed in presence of EAD-like abnormalities on the CaTs.

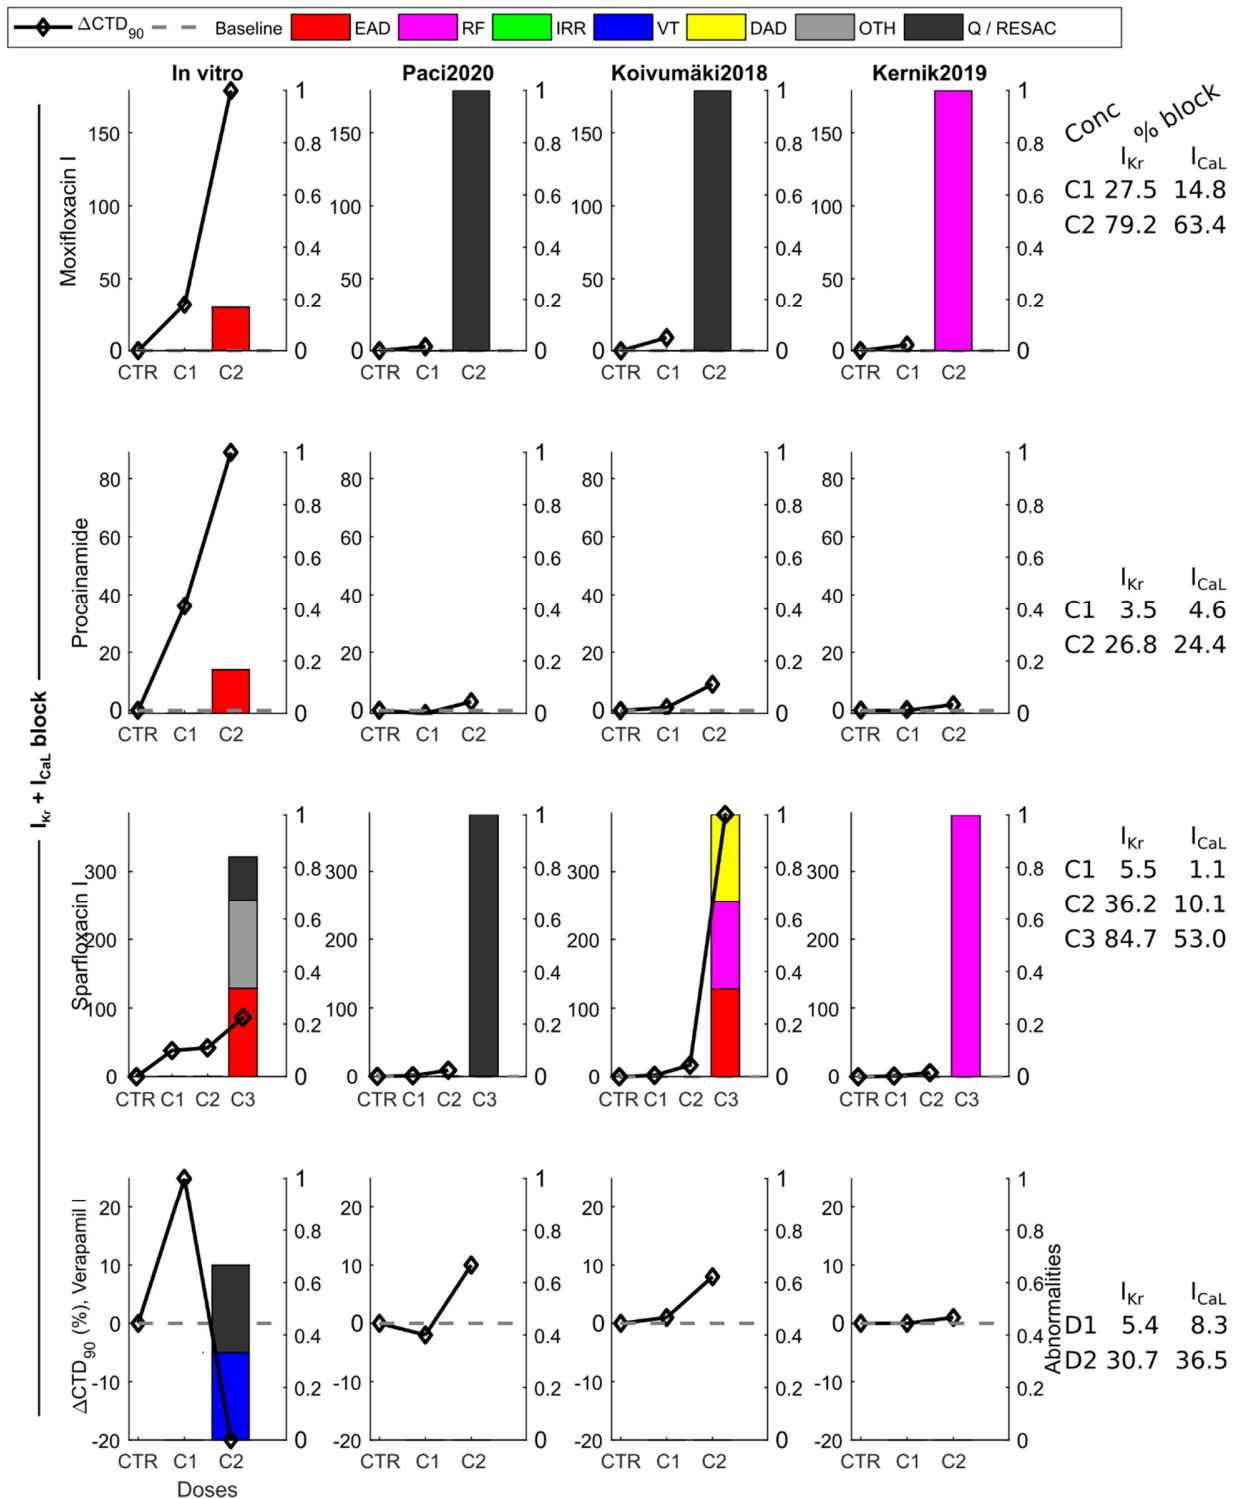

Figure S6. Left axis: percentage change in  $\text{Ca}^{2+}$  transient ( $\text{CaT}$ ) duration with respect to baseline as consequence of drug administration ( $\Delta\text{CTD}_{90}\%$ ). *In vitro* and *in silico* experiments are reported as black diamonds. In case of missing *in silico* data points, the simulations produced AP/ $\text{CaT}$  arrhythmic events and it was not possible to compute the  $\text{CTD}_{90}$ . Right axis: occurrence of arrhythmic events or cessation of spontaneous activity. *In vitro* data are reported as percent of events recorded on the six



observations. In case of multiple *in silico* events, the bar was split accordingly. Events were classified as in Figure 3. CTD<sub>90</sub> values for Koivumäki2018 for sparfloxacin concentration C3 were manually computed in presence of EAD-like abnormalities on the CaTs.

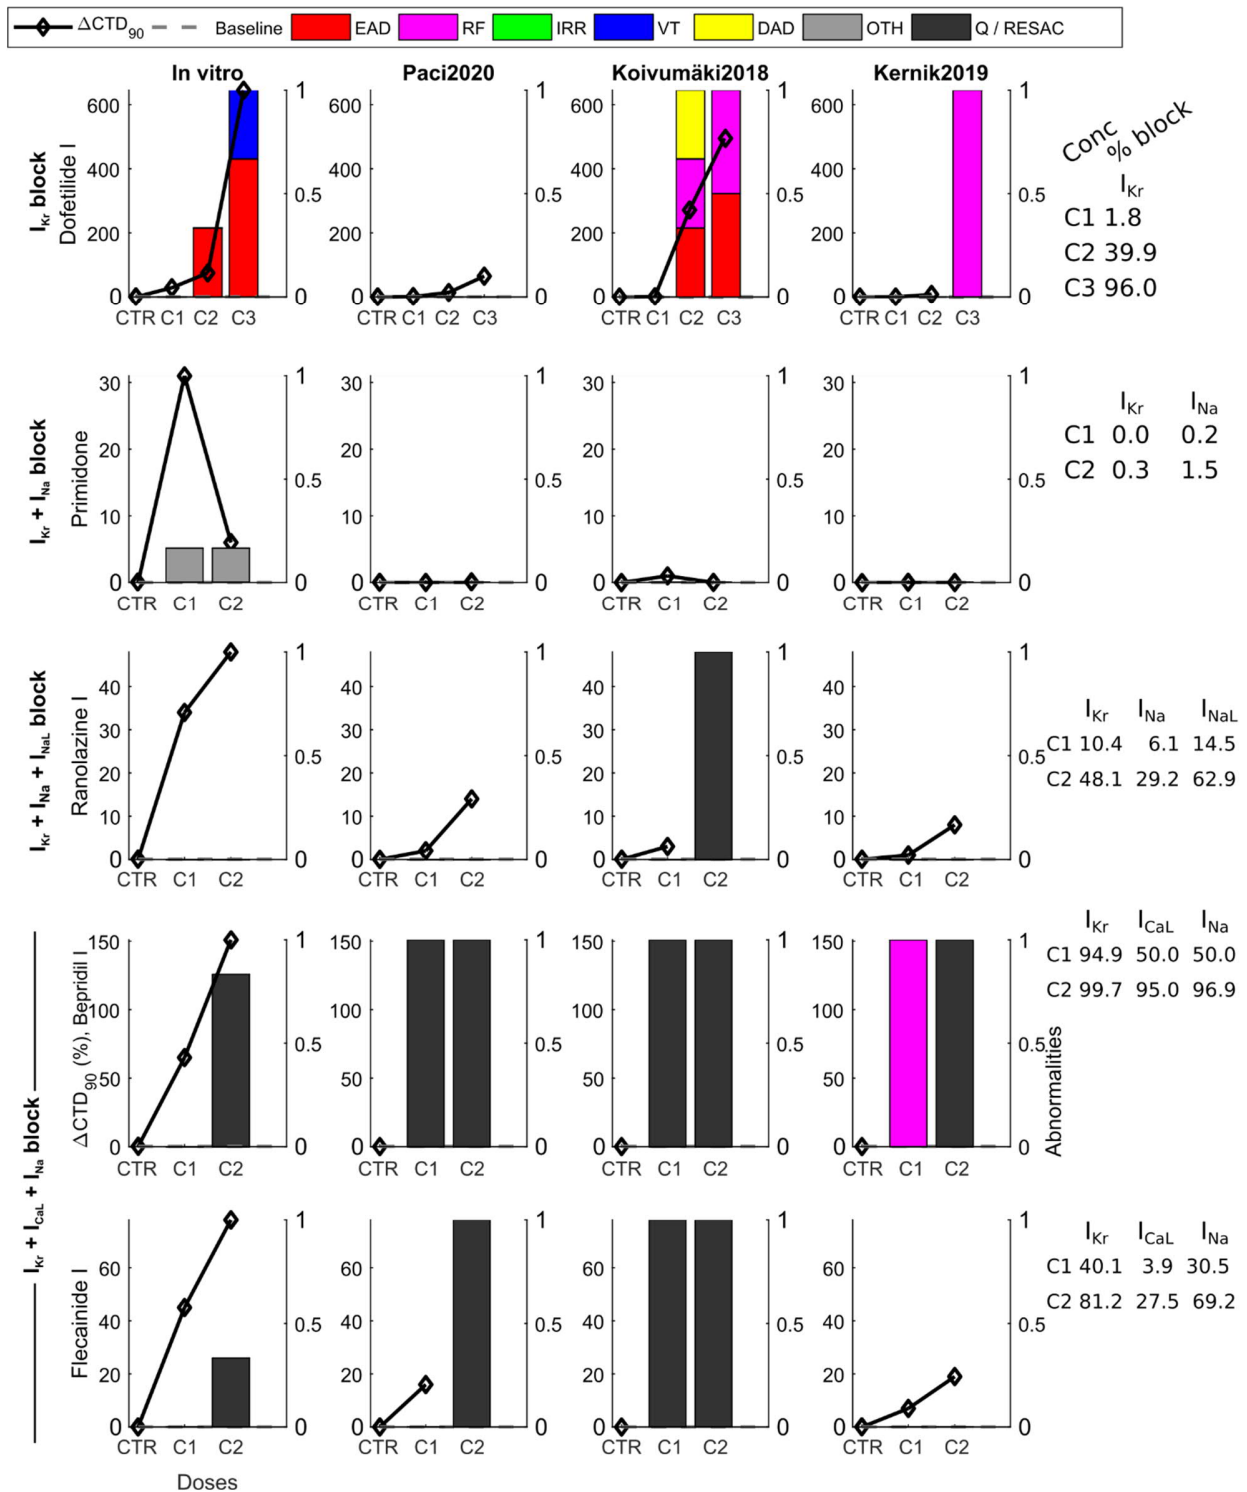

Figure S7. Left axis: percentage change in  $\text{Ca}^{2+}$  transient ( $\text{CaT}$ ) duration with respect to baseline as consequence of drug administration ( $\Delta\text{CTD}_{90}$ ). *In vitro* and *in silico* experiments are reported as black diamonds. In case of missing *in silico* data points, the simulations produced AP/ $\text{CaT}$  arrhythmic events and it was not possible computing the  $\text{CTD}_{90}$ . Right axis: occurrence of arrhythmic events or cessation of spontaneous activity. *In vitro* data are reported as percent of events recorded on the six

observations. In case of multiple *in silico* events, the bar was split accordingly. Events were defined as in Figure 3. CTD<sub>90</sub> values for Koivumäki2018 for dofetilide concentration C2 and C3 were manually computed in presence of EAD-like abnormalities on the CaTs.

## 2 Supplementary Tables

Table S1: IC<sub>50</sub> and Hill's coefficients (in brackets) for the 15 drugs tested *in vitro*. If a drug has been characterized by multiple (IC<sub>50</sub>, Hill's coefficient) sets, the name of the drug is followed by I, II and III. This table was adapted from (Passini et al., 2017) and the drug names were kept consistent with it.

| Compound List |                   | IC <sub>50</sub> (h), with IC <sub>50</sub> in μM |                 |                  |                  |                 |                 |                 |
|---------------|-------------------|---------------------------------------------------|-----------------|------------------|------------------|-----------------|-----------------|-----------------|
|               |                   | I <sub>Na</sub>                                   | I <sub>Kr</sub> | I <sub>CaL</sub> | I <sub>NaL</sub> | I <sub>Ks</sub> | I <sub>to</sub> | I <sub>K1</sub> |
| 1             | BaCl <sub>2</sub> |                                                   | 257(1)          |                  |                  |                 |                 | 4.5(1)          |
| 2             | Bepriidil I       | 1(1.49)                                           | 0.09(1.21)      | 1(1.28)          |                  |                 |                 |                 |
| 3             | Bepriidil II      | 2.3(1.26)                                         | 0.16(0.88)      | 1(1.28)          |                  |                 |                 |                 |
| 4             | Bepriidil III     | 2.929(1.2)                                        | 0.149(0.9)      | 2.808(0.6)       | 1.814(1.4)       |                 |                 |                 |
| 5             | Dofetilide I      | 31.9(0.54)                                        | 0.013(1.56)     | 201(1)           |                  | 135(1)          | 300(1)          |                 |
| 6             | Dofetilide II     | 162.1(1)                                          | 0.03(1.2)       | 26.7(1)          |                  |                 |                 |                 |
| 7             | Dofetilide III    |                                                   | 0.001(0.6)      |                  |                  |                 |                 |                 |
| 8             | Flecainide I      | 3.19(0.71)                                        | 1.64(0.81)      | 27.1(0.97)       |                  |                 |                 |                 |
| 9             | Flecainide II     | 6.2(1.14)                                         | 1.5(0.88)       | 27.1(0.97)       |                  |                 |                 |                 |
| 10            | Flecainide III    | 6.677(1.9)                                        | 0.692(0.8)      | 25.599(1.4)      | 18.87(0.6)       |                 | 9.266(0.7)      |                 |
| 11            | Lidocaine II      | 44(0.94)                                          | 300(1)          |                  | 10.79(1.3)       |                 |                 |                 |
| 12            | Mexiletine II     | 49.7(0.94)                                        | 69.4(1.11)      | 203(0.75)        | 8.957(1.4)       | 32.6(0.92)      | 367(0.91)       |                 |
| 13            | Moxifloxacin I    | 1563(1)                                           | 79(1)           | 173(1)           |                  |                 |                 |                 |
| 14            | Moxifloxacin II   | 1112(1)                                           | 86.2(0.94)      | 173(1)           |                  |                 |                 |                 |
| 15            | Moxifloxacin III  |                                                   | 93.041(0.6)     |                  | 382.337(1.1)     | 50.321(1)       |                 |                 |
| 16            | Nimodipine        |                                                   | 45.6(1)         | 0.139(0.63)      |                  |                 |                 |                 |
| 17            | Nisoldipine       | 45(0.72)                                          | 49.3(0.84)      | 0.009(0.71)      | 61.7(0.71)       | 52.8(1.03)      |                 |                 |
| 18            | Phenytoin         | 72.4(1.06)                                        | 147(1)          | 21.9(0.99)       |                  |                 |                 |                 |
| 19            | Primidone         | 640(1)                                            | 3360(1)         |                  |                  |                 |                 |                 |
| 20            | Procainamide      | 746.6(1)                                          | 272.4(1)        | 389.5(0.83)      |                  |                 |                 |                 |
| 21            | Ranolazine I      | 30.2(0.8)                                         | 10.9(0.9)       | 172(0.6)         | 5.9(1)           |                 |                 |                 |
| 22            | Ranolazine II     |                                                   | 6.49(0.8)       |                  | 7.887(0.9)       |                 |                 |                 |
| 23            | Sparfloxacin I    | 1465(1)                                           | 17.7(0.99)      | 88.8(1)          |                  |                 |                 |                 |
| 24            | Sparfloxacin II   | 2555(1)                                           | 22.1(0.93)      | 88.8(1)          |                  |                 |                 |                 |
| 25            | Verapamil I       | 32.5(1.33)                                        | 0.25(0.89)      | 0.2(0.8)         |                  |                 |                 |                 |
| 26            | Verapamil II      | 7.2(0.95)                                         | 0.83(1.17)      | 0.1(0.7)         | 6.1(1.24)        | 65.6(0.92)      |                 | 9.03(1)         |
| 27            | Verapamil III     |                                                   | 0.499(1.1)      | 0.202(1.1)       |                  |                 |                 |                 |

Table S2. Percent CaT duration variation with respect to baseline ( $\Delta$ CTD<sub>90</sub>%), arrhythmic events (ARR) and automaticity cessation (AC) *in vitro* and *in silico*. Arrhythmic events: early and delayed after-depolarization (EAD, DAD), repolarization failure (RF), irregular rhythm (IRR), ventricular tachycardia-like rhythm (VT) and other arrhythmic events (OTH). Automaticity cessation: quiescence (Q) and residual activity (RESAC). \*: *in silico*  $\Delta$ CTD<sub>90</sub>% marked with a star were computed on EADs. \*\*: depolarized maximum diastolic potential, high rate Ca<sup>2+</sup> oscillations but no RF.

| Drug              | Conc. ( $\mu$ M) | <i>In vitro</i>              |                   | Paci2020                     |         | Koivumäki2018                |                  | Kernik2019                   |         |
|-------------------|------------------|------------------------------|-------------------|------------------------------|---------|------------------------------|------------------|------------------------------|---------|
|                   |                  | $\Delta$ CTD <sub>90</sub> % | ARR, AC           | $\Delta$ CTD <sub>90</sub> % | ARR, AC | $\Delta$ CTD <sub>90</sub> % | ARR, AC          | $\Delta$ CTD <sub>90</sub> % | ARR, AC |
| BaCl <sub>2</sub> | 1                | 5                            | ---               | 4                            | ---     | 6                            | ---              | -3                           | ---     |
| BaCl <sub>2</sub> | 10               | 20                           | OTH 1/6           | 29                           | ---     | 83*                          | EAD<br>RF        | **                           | ---     |
| BaCl <sub>2</sub> | 100              | 47                           | VT 1/6<br>OTH 2/6 | ---                          | RF      | ---                          | RF               | **                           | ---     |
| Bepriidil I       | 1                | 65                           | ---               | ---                          | Q       | ---                          | RESAC            | ---                          | RF      |
| Bepriidil I       | 10               | 151                          | Q 5/6             | ---                          | Q       | ---                          | RESAC            | ---                          | Q       |
| Bepriidil II      | 1                | 65                           | ---               | ---                          | Q       | ---                          | RESAC            | ---                          | RF      |
| Bepriidil II      | 10               | 151                          | Q 5/6             | ---                          | Q       | ---                          | RESAC            | ---                          | Q       |
| Bepriidil III     | 1                | 65                           | ---               | 25                           | ---     | ---                          | RESAC            | ---                          | RF      |
| Bepriidil III     | 10               | 151                          | Q 5/6             | ---                          | Q       | ---                          | RESAC            | ---                          | Q       |
| Dofetilide I      | 0.001            | 29                           | ---               | 1                            | ---     | 1                            | ---              | 0                            | ---     |
| Dofetilide I      | 0.01             | 75                           | EAD 2/6           | 14                           | ---     | 277*                         | EAD<br>DAD<br>RF | 8                            | ---     |
| Dofetilide I      | 0.1              | 645                          | EAD 4/6<br>VT 4/6 | 65                           | ---     | 503*                         | EAD<br>RF        | ---                          | RF      |
| Dofetilide II     | 0.001            | 29                           | ---               | 1                            | ---     | 0                            | ---              | 0                            | ---     |
| Dofetilide II     | 0.01             | 75                           | EAD 2/6           | 7                            | ---     | 8                            | ---              | 4                            | ---     |
| Dofetilide II     | 0.1              | 645                          | EAD 4/6<br>VT 4/6 | 35                           | ---     | 610*                         | EAD<br>DAD<br>RF | ---                          | RF      |
| Dofetilide III    | 0.001            | 29                           | ---               | 17                           | ---     | 881*                         | EAD<br>DAD<br>RF | 12                           | ---     |
| Dofetilide III    | 0.01             | 75                           | EAD 2/6           | 35                           | ---     | 523*                         | EAD<br>DAD<br>RF | ---                          | RF      |
| Dofetilide III    | 0.1              | 645                          | EAD 4/6<br>VT 4/6 | 62                           | ---     | 641*                         | EAD<br>DAD<br>RF | ---                          | RF      |
| Flecainide I      | 1                | 45                           | ---               | 16                           | ---     | ---                          | RESAC            | 7                            | ---     |
| Flecainide I      | 10               | 78                           | Q 2/6             | ---                          | Q       | ---                          | RESAC            | 19                           | ---     |

## Supplementary Material

| Drug             | Conc. (µM) | <i>In vitro</i>      |                 | Paci2020             |          | Koivumäki2018      |                  | Kernik2019           |          |
|------------------|------------|----------------------|-----------------|----------------------|----------|--------------------|------------------|----------------------|----------|
|                  |            | ΔCTD <sub>90</sub> % | ARR, ABN        | ΔCTD <sub>90</sub> % | ARR, ABN | ΔCTD <sub>90</sub> | ARR, ABN         | ΔCTD <sub>90</sub> % | ARR, ABN |
| Flecainide II    | 1          | 45                   | ---             | 14                   | ---      | 219*               | EAD<br>DAD<br>RF | 8                    | ---      |
| Flecainide II    | 10         | 78                   | Q 2/6           | ---                  | Q        | ---                | RESAC            | ---                  | RF       |
| Flecainide III   | 1          | 45                   | ---             | 20                   | ---      | 599*               | EAD<br>DAD<br>RF | ---                  | RF       |
| Flecainide III   | 10         | 78                   | Q 2/6           | ---                  | Q        |                    | RESAC            | ---                  | RF       |
| Lidocaine II     | 10         | 50                   | ---             | 2                    | ---      | 5                  | ---              | 1                    | ---      |
| Lidocaine II     | 100        | 81                   | ---             | ---                  | Q        | ---                | RESAC            | 4                    | ---      |
| Mexiletine II    | 10         | 26                   | Q 3/6           | 0                    | ---      | 7                  | ---              | 2                    | ---      |
| Mexiletine II    | 100        | 130                  | Q 4/6           | ---                  | Q        | ---                | RESAC            | 12                   | ---      |
| Moxifloxacin I   | 30         | 32                   | ---             | 3                    | ---      | 9                  | ---              | 4                    | ---      |
| Moxifloxacin I   | 300        | 179                  | EAD 1/6         | ---                  | Q        | ---                | RESAC            | ---                  | RF       |
| Moxifloxacin II  | 30         | 32                   | ---             | 3                    | ---      | 9                  | ---              | 4                    | ---      |
| Moxifloxacin II  | 300        | 179                  | EAD 1/6         | ---                  | Q        | ---                | RESAC            | ---                  | RF       |
| Moxifloxacin III | 30         | 32                   | ---             | 12                   | ---      | 141*               | EAD<br>DAD<br>RF | 8                    | ---      |
| Moxifloxacin III | 300        | 179                  | EAD 1/6         | 30                   | ---      | ---                | RF               | ---                  | RF       |
| Nimodipine       | 0.1        | 7                    | Q2/6            | ---                  | Q        | ---                | IRR              | -7                   | ---      |
| Nimodipine       | 1          | -14                  | VT 1/6<br>Q 2/6 | ---                  | Q        | ---                | RESAC            | ---                  | IRR      |
| Nisoldipine      | 0.1        | 31                   | ---             | ---                  | Q        | ---                | RESAC            | ---                  | IRR<br>Q |
| Nisoldipine      | 1          | 32                   | VT 4/6<br>Q 2/6 | ---                  | Q        | ---                | RESAC            | ---                  | IRR<br>Q |
| Nisoldipine      | 10         | -32                  | ---             | ---                  | Q        | ---                | RESAC            | ---                  | Q        |
| Phenytoin        | 3          | 24                   | ---             | -5                   | ---      | 0                  | ---              | -1                   | ---      |
| Phenytoin        | 30         | 15                   | Q 1/6           | ---                  | Q        | ---                | RESAC            | -8                   | ---      |
| Primidone        | 1          | 31                   | OTH 1/6         | 0                    | ---      | 1                  | ---              | 0                    | ---      |
| Primidone        | 10         | 6                    | OTH 1/6         | 0                    | ---      | 0                  | ---              | 0                    | ---      |
| Procainamide     | 10         | 36                   | ---             | -1                   | ---      | 1                  | ---              | 0                    | ---      |
| Procainamide     | 100        | 89                   | EAD 1/6         | -3                   | ---      | 9                  | ---              | 2                    | ---      |
| Ranolazine I     | 1          | 34                   | ---             | 2                    | ---      | 3                  | ---              | 1                    | ---      |
| Ranolazine I     | 10         | 48                   | ---             | 14                   | ---      | ---                | RESAC            | 8                    | ---      |
| Ranolazine II    | 1          | 34                   | ---             | 6                    | ---      | 7                  | ---              | 3                    | ---      |
| Ranolazine II    | 10         | 48                   | ---             | 20                   | ---      | 591*               | EAD<br>DAD<br>RF | ---                  | RF       |

| Drug            | Conc. (μM) | <i>In vitro</i>      |                             | Paci2020             |          | Koivumäki2018      |                  | Kernik2019           |          |
|-----------------|------------|----------------------|-----------------------------|----------------------|----------|--------------------|------------------|----------------------|----------|
|                 |            | ΔCTD <sub>90</sub> % | ARR, ABN                    | ΔCTD <sub>90</sub> % | ARR, ABN | ΔCTD <sub>90</sub> | ARR, ABN         | ΔCTD <sub>90</sub> % | ARR, ABN |
| Sparfloxacin I  | 1          | 38                   | ---                         | 1                    | ---      | 2                  | ---              | 1                    | ---      |
| Sparfloxacin I  | 10         | 42                   | ---                         | 9                    | ---      | 17                 | ---              | 6                    | ---      |
| Sparfloxacin I  | 100        | 86                   | EAD 2/6<br>Q 1/6<br>OTH 2/6 | ---                  | Q        | 386*               | EAD<br>DAD<br>RF | ---                  | RF       |
| Sparfloxacin II | 1          | 38                   | ---                         | 1                    | ---      | 2                  | ---              | 1                    | ---      |
| Sparfloxacin II | 10         | 42                   | ---                         | 8                    | ---      | 13                 | ---              | 5                    | ---      |
| Sparfloxacin II | 100        | 86                   | EAD 2/6<br>Q 1/6<br>OTH 2/6 | ---                  | Q        | 324*               | EAD<br>DAD<br>RF | ---                  | RF       |
| Verapamil I     | 0.01       | 25                   | ---                         | -2                   | ---      | 1                  | ---              | 0                    | ---      |
| Verapamil I     | 0.1        | -20                  | VT 2/6<br>Q 2/6             | ---                  | Q        | 8                  | ---              | 1                    | ---      |
| Verapamil II    | 0.01       | 25                   | ---                         | -9                   | ---      | -1                 | ---              | -1                   | ---      |
| Verapamil II    | 0.1        | -20                  | VT 2/6<br>Q 2/6             | ---                  | Q        | ---                | IRR              | -7                   | ---      |
| Verapamil III   | 0.01       | 25                   | ---                         | -1                   | ---      | 0                  | ---              | 0                    | ---      |
| Verapamil III   | 0.1        | -20                  | VT 2/6<br>Q 2/6             | ---                  | Q        | 2                  | ---              | -2                   | ---      |

## References

- Passini, E., Britton, O. J., Lu, H. R., Rohrbacher, J., Hermans, A. N., Gallacher, D. J., et al. (2017). Human In Silico Drug Trials Demonstrate Higher Accuracy than Animal Models in Predicting Clinical Pro-Arrhythmic Cardiotoxicity. *Front. Physiol.* 8, 1–15. doi:10.3389/fphys.2017.00668.
